# Supplementary material for: Evaluation of the specificity of [18F]fludarabine PET/CT in a xenograft model of follicular lymphoma: comparison with [18F]FDG and impact of rituximab therapy
Source: PubMed Central journal article supplement (PMC4414862; doi:10.1186/s13550-015-0101-7), 2015-04-14

**Additional file 1** Tumour volume growth curves (calliper measurements) of CB17 SCID mice bearing subcutaneous DOHH2 human B cell lymphoma. Mice were SC injected with tumour cells at day 0. Mice were treated with vehicle or rituximab (10 mg/kg, *ip*) at day 22, 29 and 36. Red arrows represent treatment days.  $t_0$  (day 21),  $t_1$  (day 34) and  $t_2$  (day 42) represent [ $^{18}\text{F}$ ]fludarabine PET/CT imaging days for treated animals at baseline (1 day before dosing) and follow-up scans, respectively.  $t_0'$  (day 23),  $t_1'$  (day 37) and  $t_2'$  (day 44) represent [ $^{18}\text{F}$ ]fludarabine PET/CT imaging days for vehicle animals at baseline and follow-up scans, respectively. Error bars:  $\pm$  SEM.

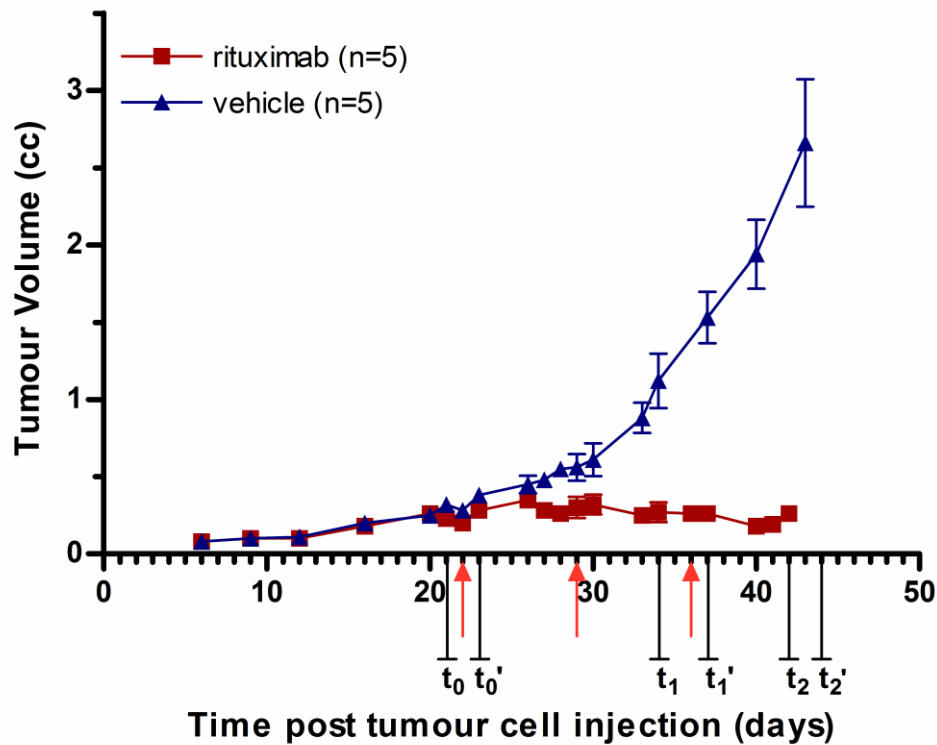

Supplement: 13550_2015_101_MOESM1_ESM.pdf [file 13550_2015_101_MOESM1_ESM.pdf]
