# Supplementary material for: Evaluation of the specificity of [18F]fludarabine PET/CT in a xenograft model of follicular lymphoma: comparison with [18F]FDG and impact of rituximab therapy
Source: PubMed Central journal article supplement (PMC4414862; doi:10.1186/s13550-015-0101-7), 2015-04-14

**Additional file 2** Time activity curves (TAC) of the tumour and muscle (non-target tissue) with [<sup>18</sup>F]fludarabine. TACs were determined on dynamic PET images (n = 3). On PET/CT fused data, blue and yellow arrows indicate tumor and muscle, respectively. Error bars: ± SEM.

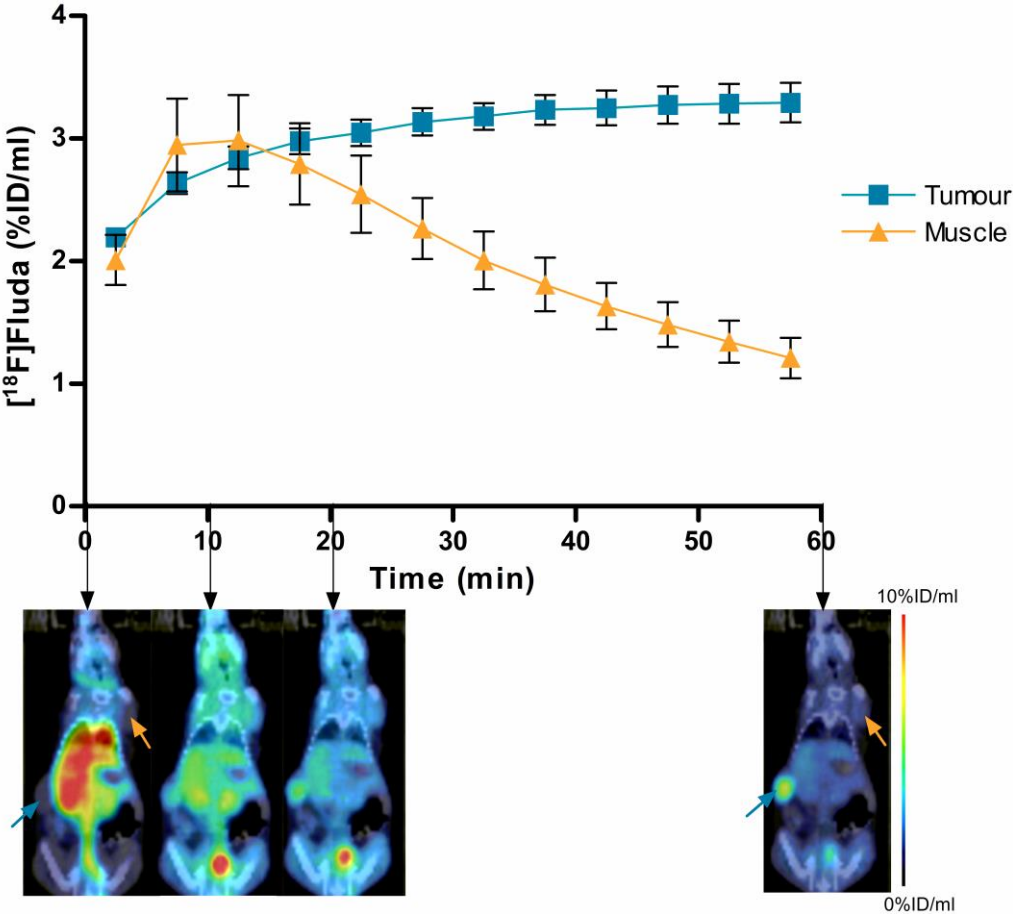

Supplement: 13550_2015_101_MOESM2_ESM.pdf [file 13550_2015_101_MOESM2_ESM.pdf]
